# Supplementary material for: Molecular atlas of the adult mouse brain
Source: PubMed Central journal article supplement — Sci Adv. 2020 Jun 26;6(26):eabb3446. doi: 10.1126/sciadv.abb3446 (PMC7319762; doi:10.1126/sciadv.abb3446), 2020-06-26
Supplement: abb3446_SM.pdf [file abb3446_SM.pdf]

[advances.sciencemag.org/cgi/content/full/6/26/eabb3446/DC1](https://advances.sciencemag.org/cgi/content/full/6/26/eabb3446/DC1)

## Supplementary Materials for

### **Molecular atlas of the adult mouse brain**

Cantin Ortiz, Jose Fernandez Navarro, Aleksandra Jurek, Antje Märtin, Joakim Lundeberg\*, Konstantinos Meletis\*

\*Corresponding author. Email: [joalun@kth.se](mailto:joalun@kth.se) (J.L.); [dinos.meletis@ki.se](mailto:dinos.meletis@ki.se) (K.M.)

Published 26 June 2020, *Sci. Adv.* **6**, eabb3446 (2020)  
DOI: 10.1126/sciadv.abb3446

#### **The PDF file includes:**

Figs. S1 to S13  
Legends for movies S1 to S5

#### **Other Supplementary Material for this manuscript includes the following:**

(available at [advances.sciencemag.org/cgi/content/full/6/26/eabb3446/DC1](https://advances.sciencemag.org/cgi/content/full/6/26/eabb3446/DC1))

Movies S1 to S5

**Fig. S1. Registration of the 75 coronal brain sections.**

The mouse brain reference atlas (ABA) in red was transformed during registration to align with the HE stained brain tissue images. Sections are sorted by decreasing Bregma coordinates along the anteroposterior axis. Adjacent sections have the same ID and can be differentiated by the appended letter. Sections 36, 39 and 40 were divided into two or three subregions as the atlas outline could not be fitted on the entire section.

**Fig. S2. Quality control of sequencing data.**

(A) Distribution of spots detected per gene in semi-log scale. Dashed line represents the cutoff set to discard genes expressed in less than 100 spots.

(B) Distribution of unique genes per spot. Dashed line represents the cutoff set to discard spots expressing less than 1000 genes.

(C) Boxplot of unique genes, each box representing a section. Box is the interquartile range, dash the median, star the mean, whiskers delimitate extreme values.

(D) Distribution of reads per gene in semi-log scale.

(E) Distribution of reads per spot.

(F) Boxplot of reads per spot, each box representing a section as in (C).

(G) View of a coronal section with segmented nuclei in black and segmented spot contours in red.

(H) Distribution of nuclei segmented per spot.

(I) Correlation between segmented nuclei and unique genes per spot. Pearson correlation coefficient: 0.348.

(J) Correlation between segmented nuclei and reads per spot. Pearson correlation coefficient: 0.296.

**Fig. S3. Gene loads for the 45 biological independent components (ICs).**

The gene loads representing the top 20 genes for each IC is shown.

**Fig. S4. Spatial visualization of the 45 biological independent components (ICs)**

The integer attributed to every IC corresponds to its rank among the first 80 components. Only spots with scores above the 95-th percentile in absolute value are displayed in three dimensional views.

**Fig. S5. Detailed spatial composition of clusters.**

Rows correspond to the 181 molecular clusters and are ordered according to the hierarchical clustering. Stacked bar plot represents the proportion of spots registered in each of the major brain region. The color columns show the two different color schemes: the similarity color scheme is unbiased and represents molecular similarity between clusters, the categorical color scheme is used to maximize visual contrast between adjacent clusters.

**Fig. S6. Coronal views of molecular atlas color coded according to 3D t-SNE.**

Left side shows the reference ABA, and the right side shows the molecular atlas with molecular similarity color scheme based on 3D t-SNE color code.

**Fig. S7. Comparison of t-SNE and UMAP based color code to visualize molecular similarity of clusters.**

(A) Visualization of clusters using UMAP or t-SNE.

(B) 3D UMAP plot to assign color code to clusters based on molecular similarity (top). Color code applied to spots in the brain atlas shows their distribution.



- (C) Coloring of spots based on the 3D t-SNE color code in either the UMAP manifold or the t-SNE manifold (top row). Coloring of spots based on the 3D UMAP color code in either the UMAP manifold or the t-SNE manifold (bottom row).
- (D) Coloring of clusters in the fan plot according to 3D UMAP color code (inner circle). Outer circle shows color code based on neuroanatomical definitions from the ABA.
- (E) Comparison of 3D UMAP color code (left hemisphere) versus 3D t-SNE color code (right hemisphere) in coronal sections from the molecular atlas.

**Fig. S8. Coronal views of molecular atlas color coded according to 3D UMAP.**

Left side shows the reference ABA, and the right side shows the molecular atlas with molecular similarity color scheme based on 3D UMAP color code.

**Fig. S9. Gene expression in molecular clusters.**

Example images of coronal sections showing the expression of single genes as detected by ISH in the ABA database.

The left side shows ABA mouse brain reference atlas outline. The right side shows molecular atlas outline, including relevant molecular clusters with color-coded spots.

- (A) Isocortex. Plate 4, +1.84 mm from bregma.  
(B) Isocortex. Plate 14, -1.05 mm from bregma.  
(C) Striatum. Plate 7, +0.94 mm from bregma.

**Fig. S10. Single cell spatial mapping.**

(A) Correlation in logarithmic space between the normalized gene counts in the molecular atlas (ST) and the single cell (SC) dataset after batch correction (see (B)). Pearson correlation coefficient: 0.81.

(B) Detailed pipeline for the single cell spatial mapping. We applied batch correction to homogenize the ST and SC datasets, trained the neural network with all the ST spots and used it to predict a molecular cluster for each cell in the SC dataset.

(C) Fine ground truth definition that accounts for layers. In addition to a region, the molecular clusters are also assigned to layers based on the registration in the ABA. Selected layers contain at least 30% of the spots and are colored in green. Circle area is proportional to the number of spots.

(D) Comparison of mapping accuracy for glutamatergic cells with coarse (not layer dependent) and fine (including layer definition) ground truth.

**Fig. S11. Matrix of similarity between molecular clusters in the full molecular atlas and the brain palette atlas.**

Rows correspond to the original clusters ordered by hierarchical clustering. Columns represent the clusters obtained with the reduced brain palette of 266 genes. Each tile is colored according to the ratio of spots from the column palette cluster that were initially assigned to the row original cluster. The sum of each column is therefore equal to one. Black rectangle delimitates the zoom-in visible in Fig. 5 (E), corresponding clusters have yellow background and can be visualized in Fig. 5 (G). Hippocampal clusters are highlighted with pink background and displayed in Fig. 5 (H) and (I).

**Fig. S12. Expression of genes present in the brain palette.**

Expression heatmap of the 266 genes in the 181 clusters in the full molecular atlas. Clusters are ordered by hierarchical clustering and genes by peak value. Expression is computed from the batch-corrected normalized matrix which is z-scored for every gene and averaged per cluster.

**Fig. S13. GO identity for genes in the reduced brain palette.**

**(A)** Top five significant enriched GO terms for genes in the brain palette (266 genes).

**(B)** Heatmap of genes and GO terms. Genes belonging to a GO term are represented by a red tile. Out of the 266 genes from the palette, 64 are associated with at least one of the top five enriched GO terms.

**(C)** Annotation of the 266 brain palette genes into neuronal versus non-neuronal based on the GO terminology.

## VIDEOS

### **Video 1. Visualization of the spots in a reference atlas framework.**

Left side: coronal section from the ABA.

Right side: coronal section showing spots colored by the categorical color scheme according to molecular cluster. Total number of sections: 40.

### **Video 2. Generating a molecular atlas.**

Examples to visualize the process of transforming spots belonging to a molecular cluster into discrete volumes based on the SVM approach.

### **Video 3. Visualization of the molecular atlas.**

Left side: coronal section from the ABA.

Right side: coronal section showing molecular clusters after SVM smoothing and colored by the molecular similarity color scheme. Top left shows updated coronal sectioning in the anteroposterior axis (red line). Total number of sections: 84.

### **Video 4. Visualization of selected isocortical clusters in the molecular atlas.**

Visualization of selected isocortical layer- and region-specific molecular clusters in 3D (glass brain). ABA volume definitions are shown with transparent colors.

### **Video 5. Visualization of selected striatal clusters in the molecular atlas.**

Visualization of selected striatal region-specific molecular clusters in 3D (glass brain). ABA volume definition of striatum is shown with transparent color.

FIGURE S1

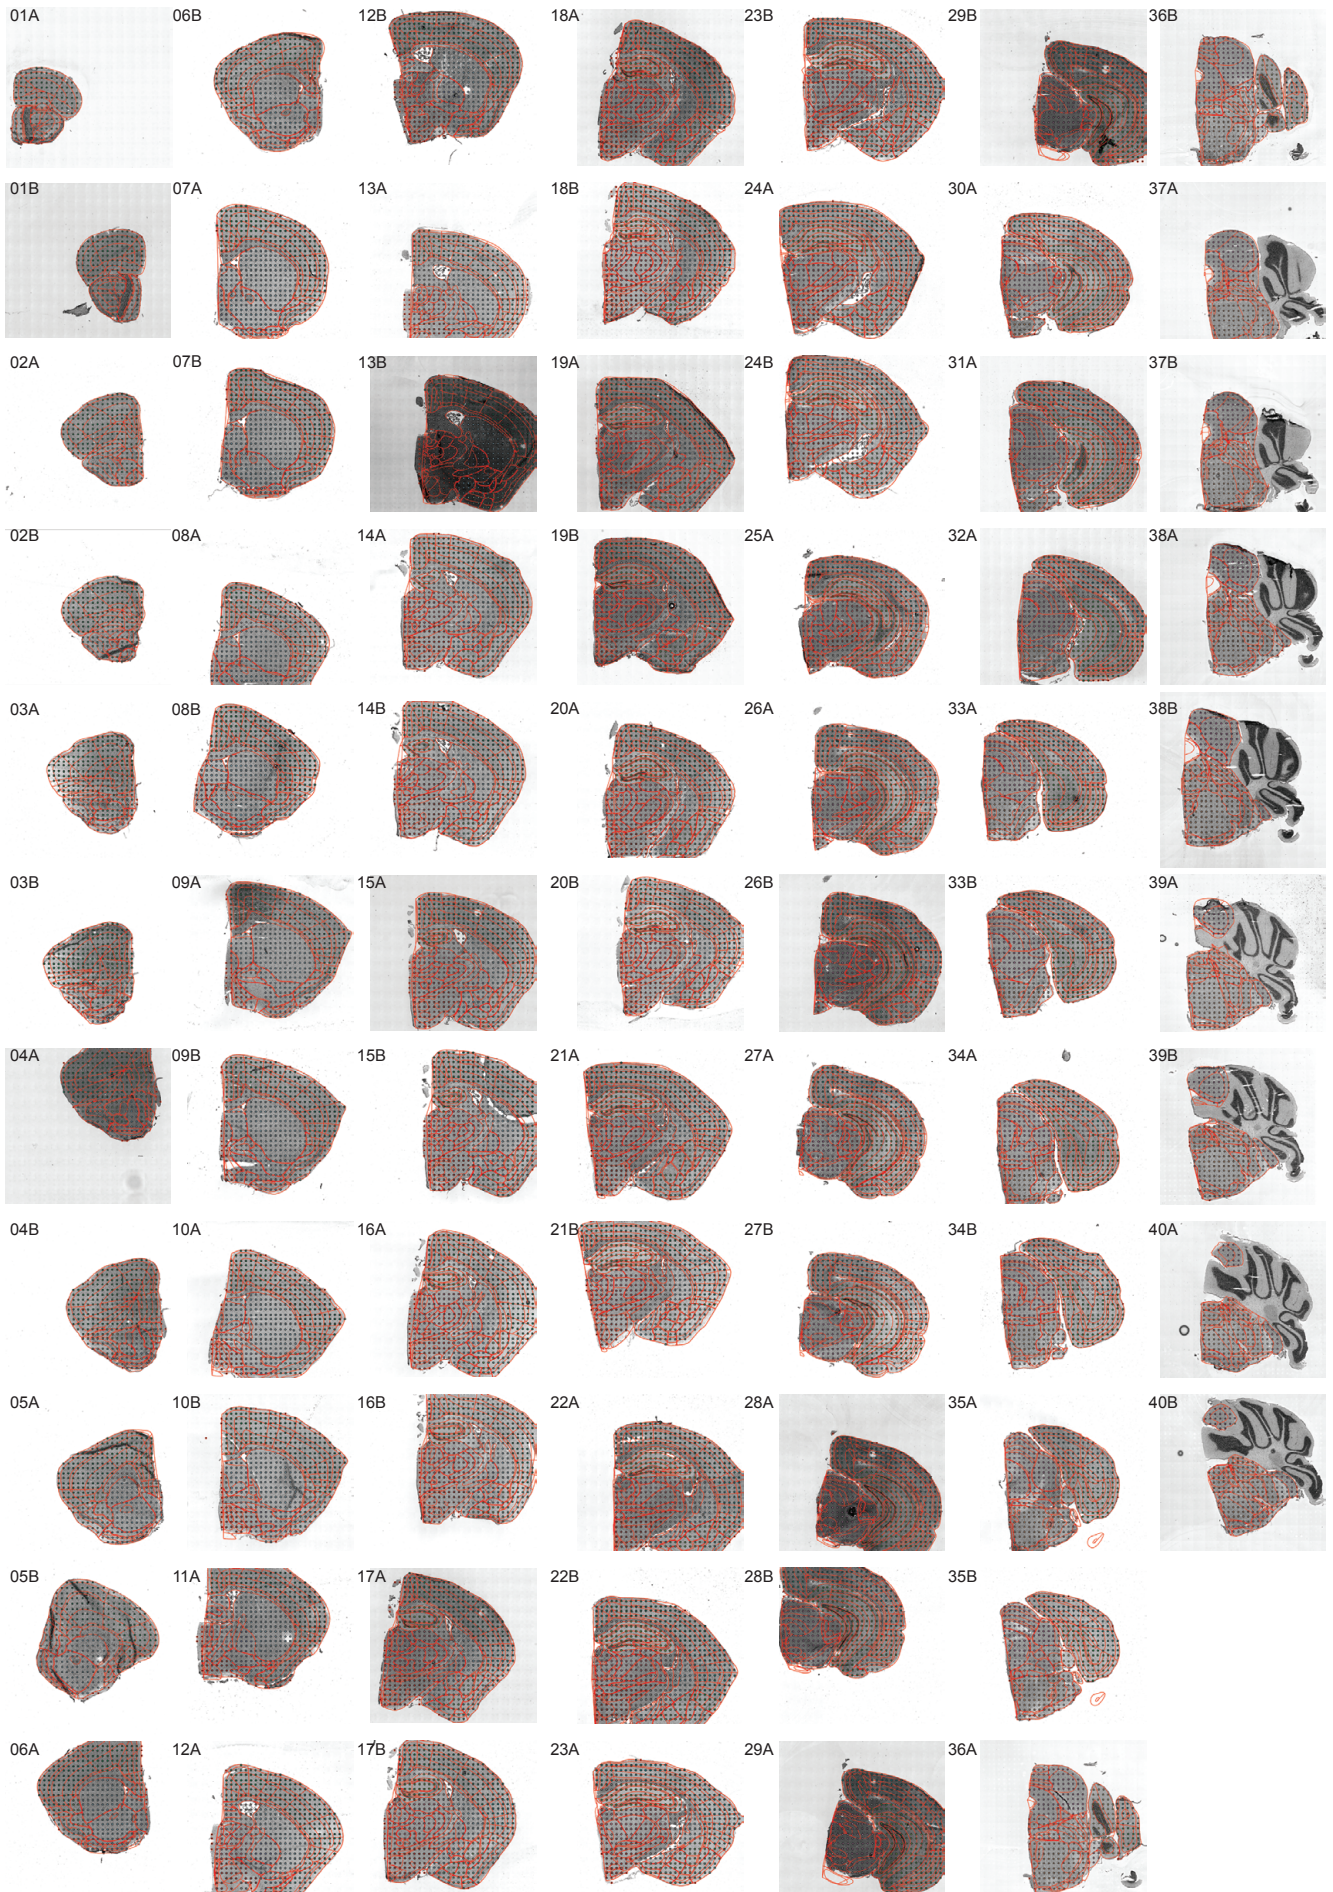



FIGURE S2

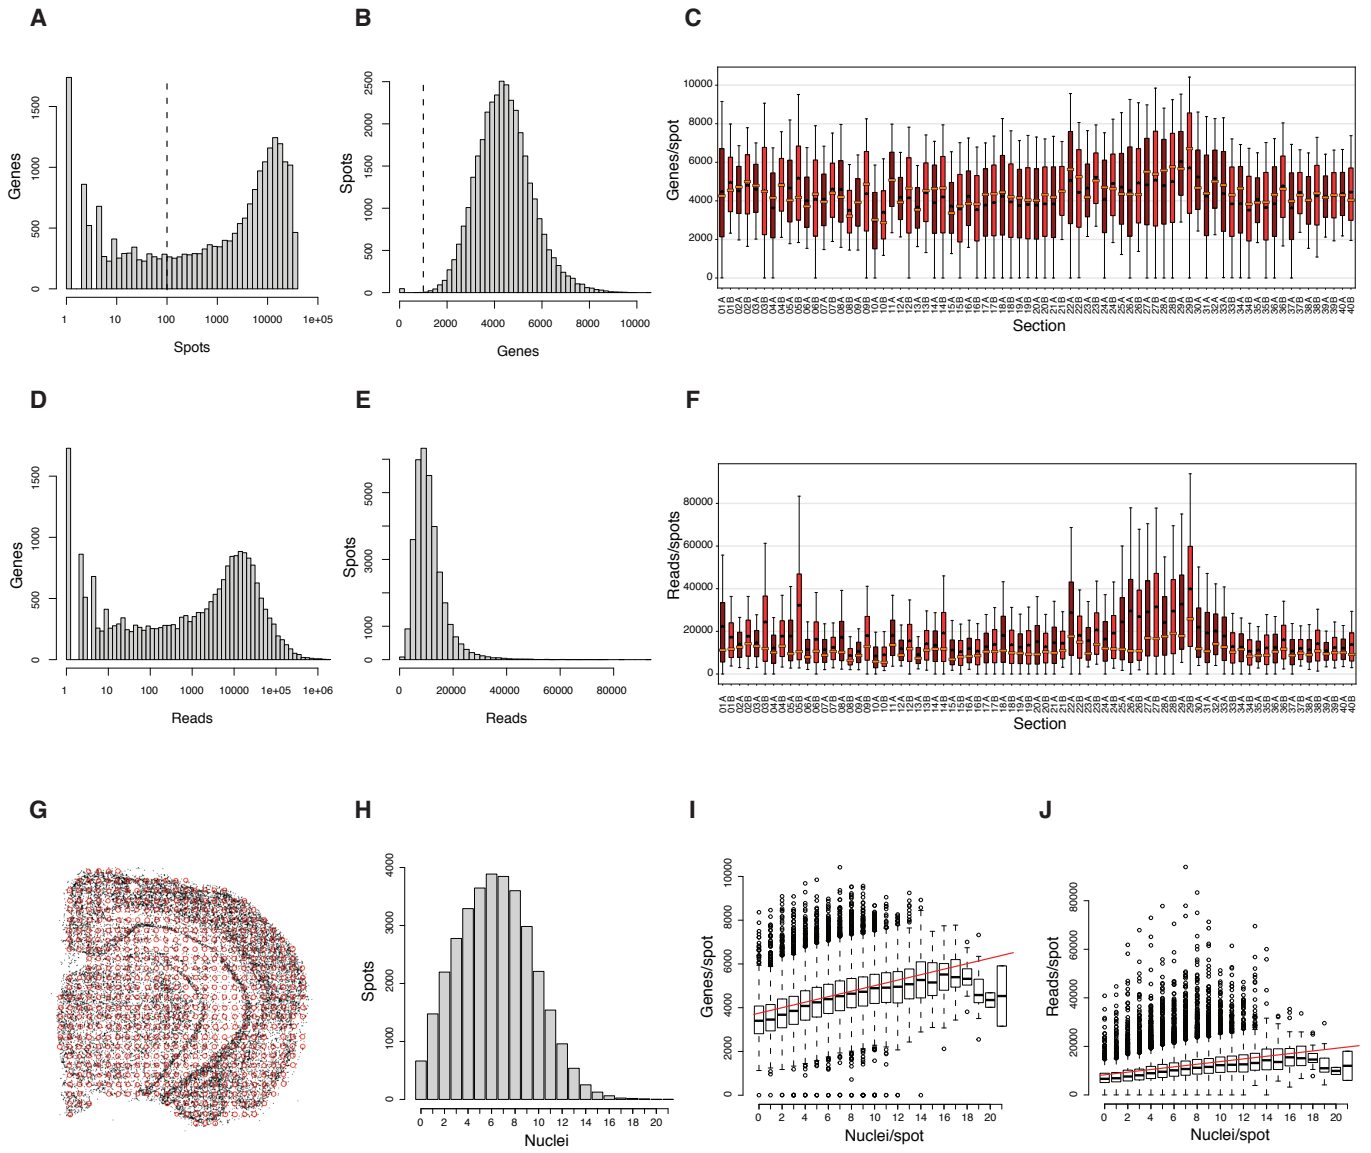

FIGURE S3

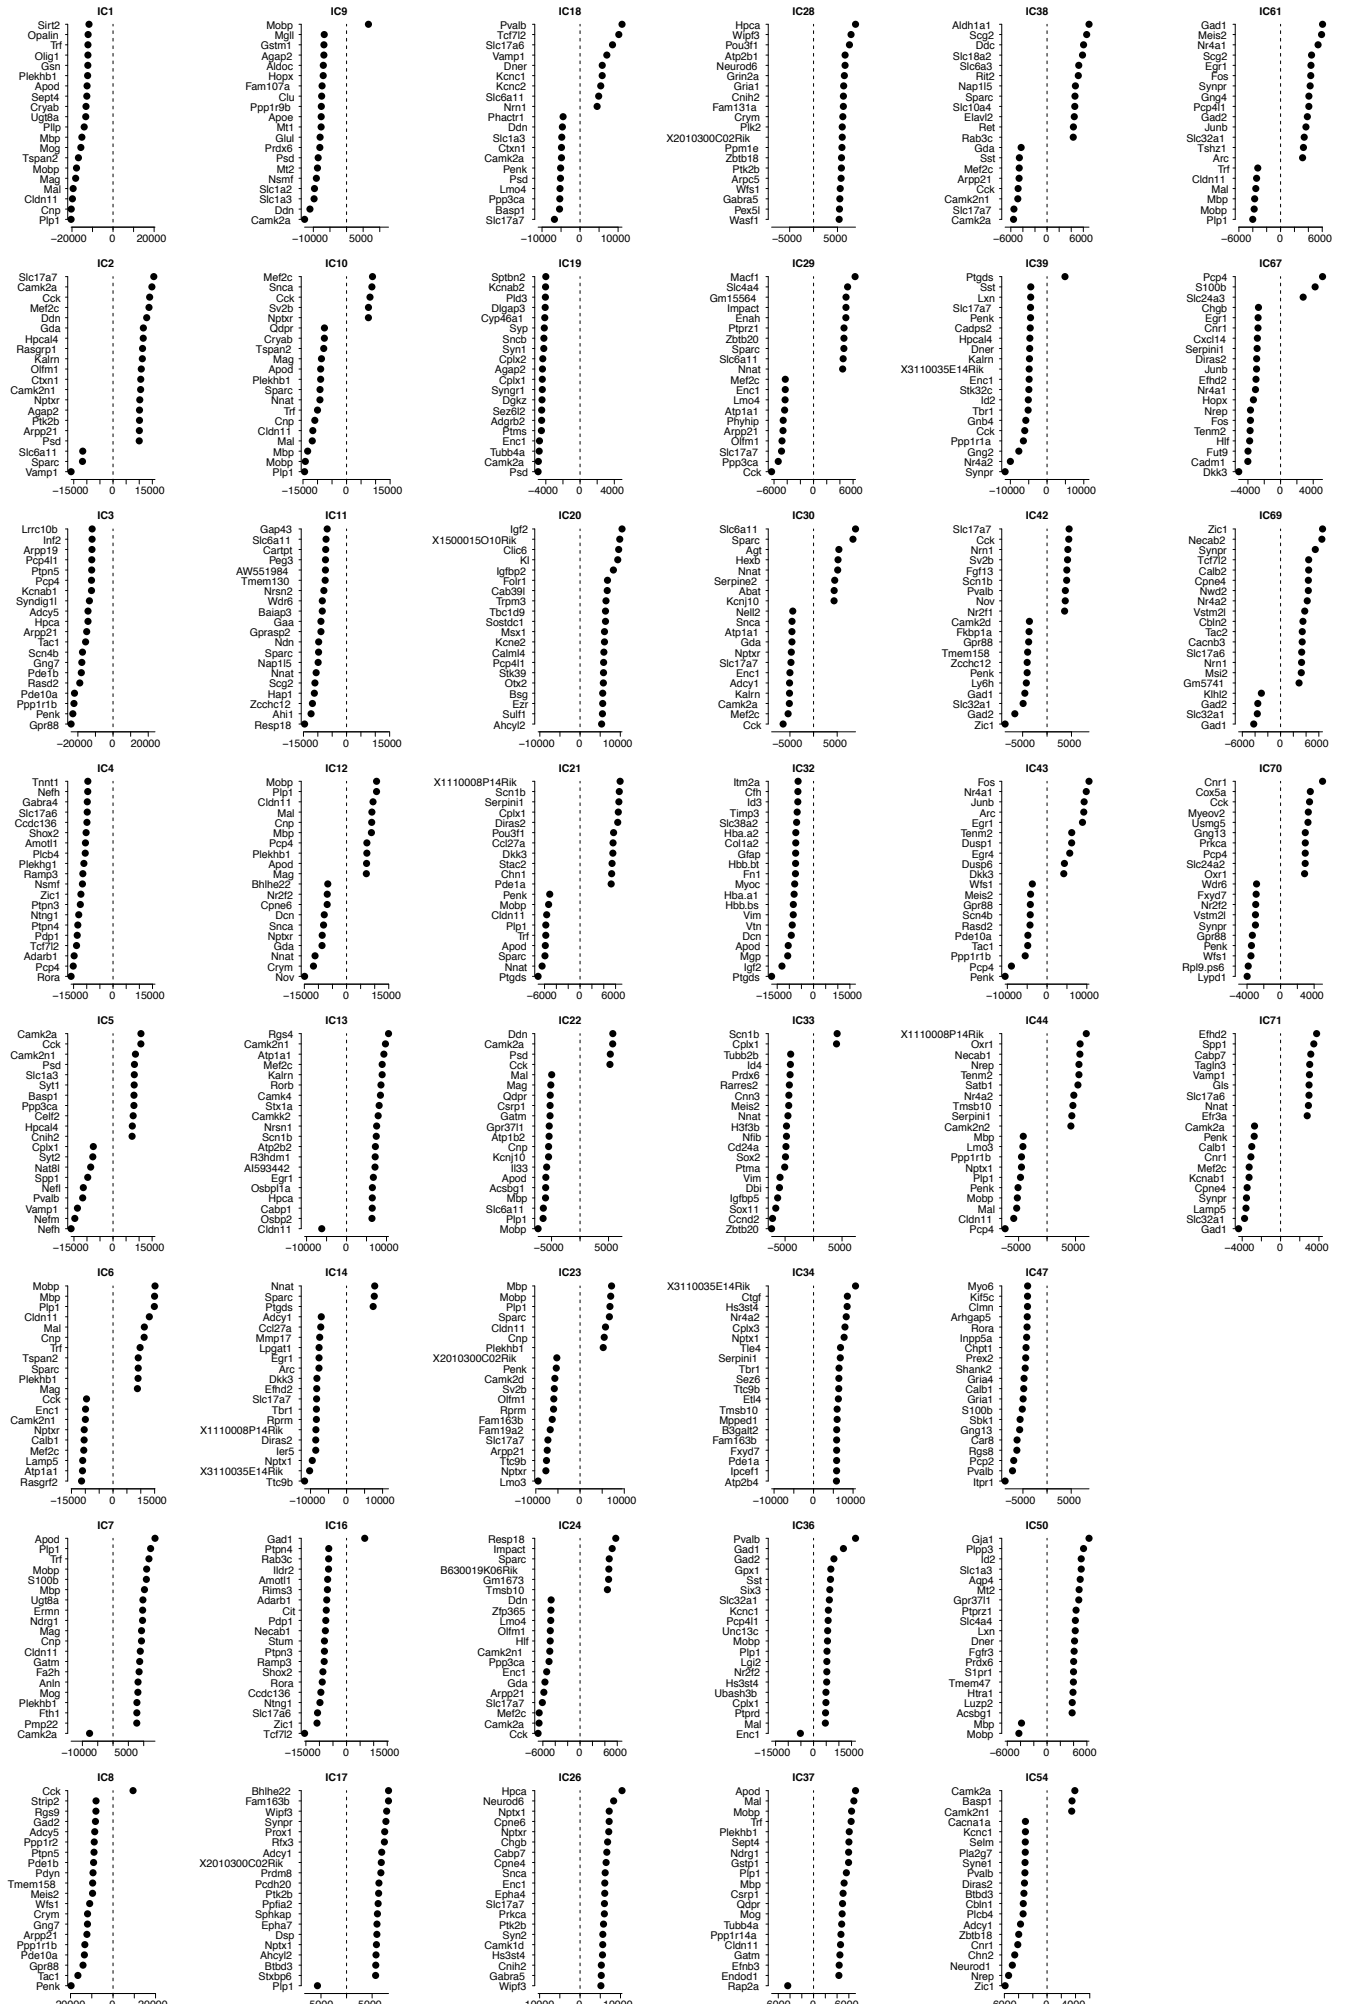

FIGURE S4

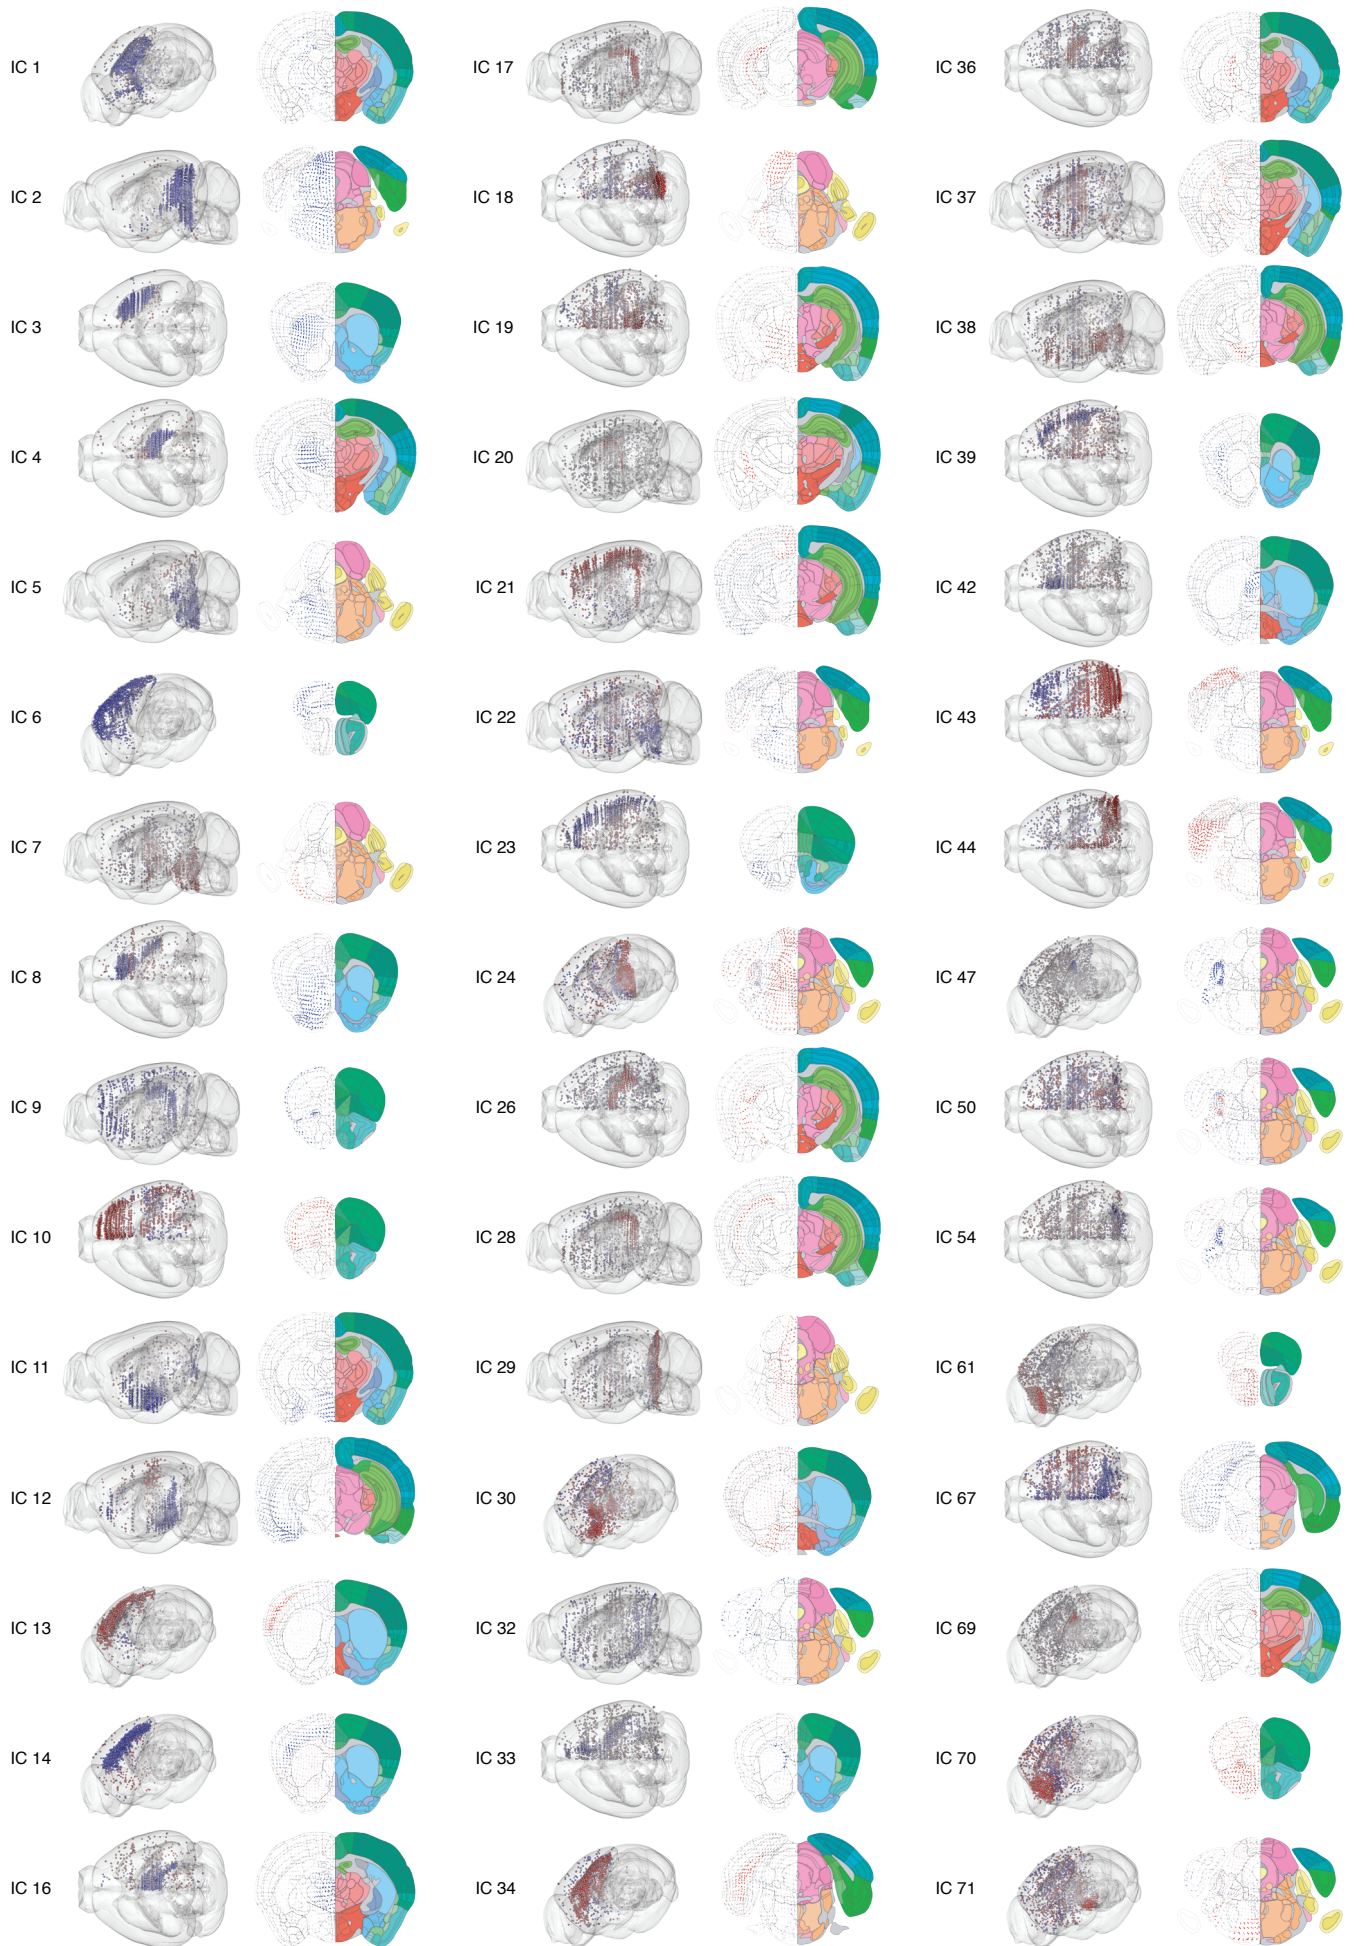



FIGURE S5

Spatial origin of spots

Colors n spots Cluster

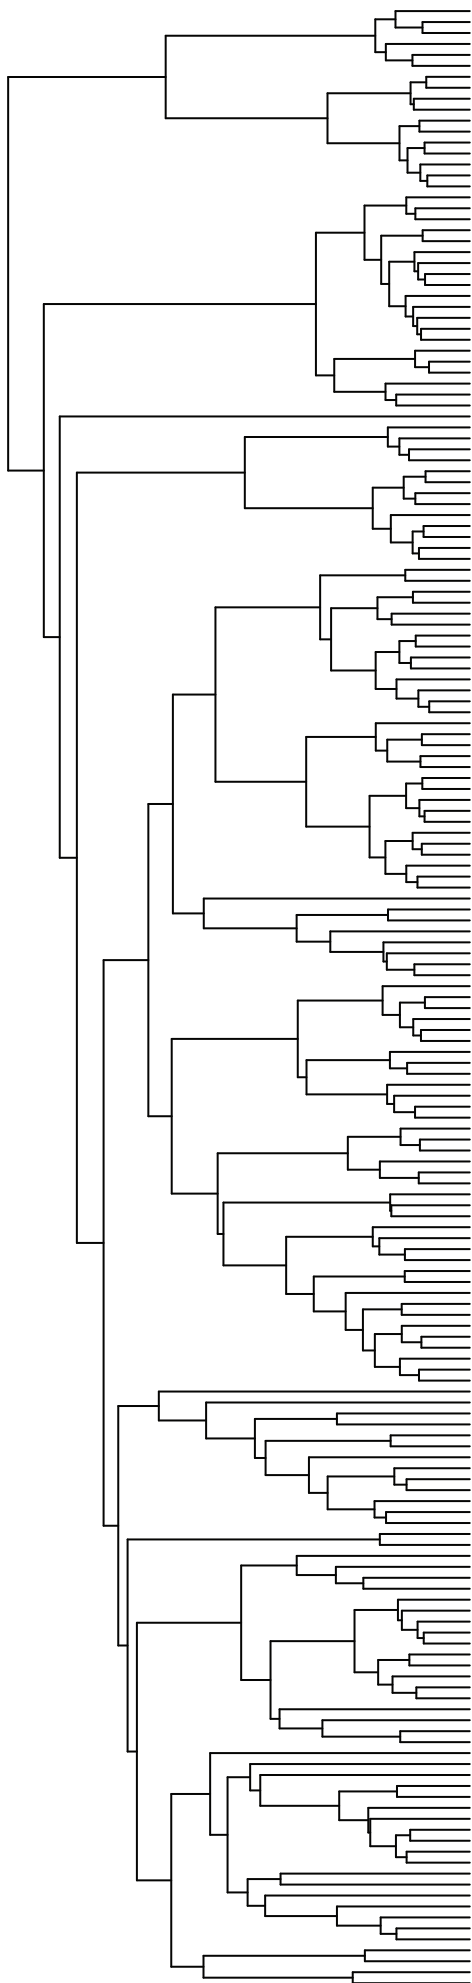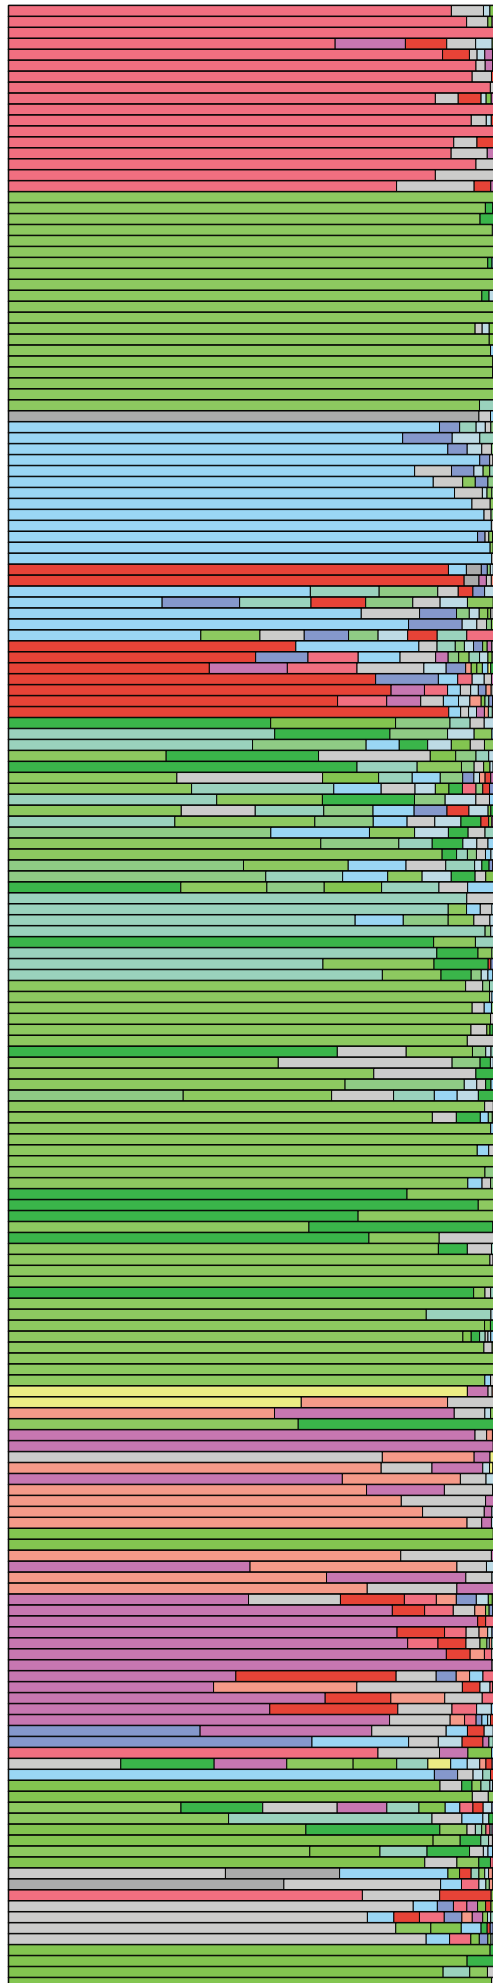

Similarity  
Categorical

| Spot ID | Cluster                            |
|---------|------------------------------------|
| 76      | Thalamus-16                        |
| 115     | Thalamus-5                         |
| 181     | Thalamus-05                        |
| 118     | Thalamus-10                        |
| 124     | Thalamus-08                        |
| 264     | Thalamus-02                        |
| 101     | Thalamus-13                        |
| 164     | Thalamus-07                        |
| 192     | Thalamus-04                        |
| 179     | Thalamus-06                        |
| 195     | Thalamus-03                        |
| 1       | Thalamus-19                        |
| 126     | Thalamus-09                        |
| 54      | Thalamus-17                        |
| 99      | Thalamus-14                        |
| 32      | Thalamus-18                        |
| 88      | Thalamus-15                        |
| 134     | Iscortex-48                        |
| 133     | Iscortex-49                        |
| 60      | Iscortex-49                        |
| 247     | Iscortex-49                        |
| 57      | Iscortex-50                        |
| 17      | Iscortex-55                        |
| 114     | Iscortex-43                        |
| 119     | Iscortex-42                        |
| 51      | Iscortex-51                        |
| 202     | Iscortex-24                        |
| 20      | Iscortex-53                        |
| 93      | Iscortex-44                        |
| 69      | Iscortex-45                        |
| 69      | Iscortex-46                        |
| 253     | Iscortex-18                        |
| 137     | Iscortex-38                        |
| 257     | Iscortex-5                         |
| 138     | Iscortex-52                        |
| 353     | Iscortex-05                        |
| 174     | Iscortex-33                        |
| 84      | Ventricular systems-02             |
| 266     | Striatum-05                        |
| 177     | Striatum-09                        |
| 201     | Striatum-01                        |
| 147     | Striatum-11                        |
| 370     | Striatum-01                        |
| 116     | Striatum-13                        |
| 210     | Striatum-07                        |
| 90      | Striatum-17                        |
| 278     | Striatum-04                        |
| 99      | Striatum-16                        |
| 130     | Striatum-12                        |
| 156     | Striatum-10                        |
| 105     | Striatum-14                        |
| 163     | Hypothalamus-06                    |
| 191     | Hypothalamus-03                    |
| 333     | Striatum-12                        |
| 321     | Mixed-02 (Striatum)                |
| 344     | Striatum-02                        |
| 100     | Striatum-02                        |
| 33      | Mixed-11 (Striatum)                |
| 107     | Hypothalamus-09                    |
| 233     | Hypothalamus-01                    |
| 175     | Hypothalamus-05                    |
| 202     | Hypothalamus-02                    |
| 190     | Hypothalamus-04                    |
| 129     | Hypothalamus-07                    |
| 242     | Hypothalamus-06                    |
| 110     | Retrohippocampal region-01         |
| 206     | Olfactory areas-08                 |
| 192     | Olfactory areas-04                 |
| 154     | Mixed-07 (Iscortex)                |
| 87      | Retrohippocampal region-04         |
| 72      | Mixed-05 (Iscortex)                |
| 143     | Mixed-10 (Iscortex)                |
| 178     | Olfactory areas-07                 |
| 317     | Mixed-04 (Olfactory areas)         |
| 173     | Cortical subplate-02               |
| 175     | Iscortex-31                        |
| 270     | Iscortex-13                        |
| 135     | Cortical subplate-03               |
| 184     | Cortical subplate-01               |
| 1       | Mixed-12 (Retrohippocampal region) |
| 66      | Olfactory areas-10                 |
| 213     | Olfactory areas-02                 |
| 152     | Olfactory areas-06                 |
| 67      | Olfactory areas-09                 |
| 70      | Retrohippocampal region-09         |
| 213     | Olfactory areas-03                 |
| 180     | Olfactory areas-05                 |
| 291     | Olfactory areas-01                 |
| 286     | Iscortex-10                        |
| 430     | Iscortex-25                        |
| 202     | Iscortex-25                        |
| 254     | Iscortex-17                        |
| 154     | Iscortex-36                        |
| 185     | Iscortex-27                        |
| 184     | Retrohippocampal region-03         |
| 331     | Iscortex-08                        |
| 191     | Iscortex-26                        |
| 274     | Iscortex-12                        |
| 299     | Mixed-05 (Cortical subplate)       |
| 334     | Iscortex-07                        |
| 122     | Iscortex-41                        |
| 345     | Iscortex-06                        |
| 211     | Iscortex-21                        |
| 128     | Iscortex-40                        |
| 183     | Iscortex-28                        |
| 257     | Iscortex-16                        |
| 171     | Iscortex-34                        |
| 202     | Retrohippocampal region-02         |
| 103     | Retrohippocampal region-10         |
| 127     | Retrohippocampal region-05         |
| 281     | Iscortex-11                        |
| 111     | Retrohippocampal region-06         |
| 202     | Iscortex-37                        |
| 153     | Iscortex-14                        |
| 268     | Iscortex-30                        |
| 178     | Retrohippocampal region-08         |
| 86      | Iscortex-04                        |
| 386     | Iscortex-29                        |
| 181     | Iscortex-35                        |
| 166     | Iscortex-35                        |
| 175     | Iscortex-32                        |
| 236     | Iscortex-20                        |
| 20      | Iscortex-54                        |
| 207     | Iscortex-22                        |
| 424     | Iscortex-03                        |
| 118     | Cerebellum-01                      |
| 40      | Cerebellum-02                      |
| 253     | Hindbrain-05                       |
| 64      | Iscortex-47                        |
| 252     | Midbrain-03                        |
| 160     | Midbrain-10                        |
| 134     | Fiber tracts-06                    |
| 144     | Hindbrain-07                       |
| 190     | Midbrain-07                        |
| 263     | Hindbrain-04                       |
| 272     | Hindbrain-03                       |
| 324     | Hindbrain-01                       |
| 300     | Hindbrain-02                       |
| 164     | Hippocampal region-07              |
| 131     | Hippocampal region-09              |
| 199     | Hindbrain-06                       |
| 99      | Midbrain-15                        |
| 112     | Hindbrain-09                       |
| 122     | Hindbrain-08                       |
| 122     | Midbrain-12                        |
| 136     | Midbrain-11                        |
| 183     | Midbrain-08                        |
| 113     | Midbrain-13                        |
| 209     | Midbrain-04                        |
| 205     | Midbrain-06                        |
| 339     | Midbrain-02                        |
| 73      | Midbrain-16                        |
| 381     | Midbrain-01                        |
| 208     | Midbrain-03                        |
| 99      | Midbrain-14                        |
| 169     | Midbrain-05                        |
| 321     | Mixed-03 (Pallidum)                |
| 328     | Pallidum-01                        |
| 103     | Thalamus-12                        |
| 233     | Mixed-06 (Fiber tracts)            |
| 252     | Striatum-06                        |
| 381     | Hippocampal region-01              |
| 61      | Hippocampal region-10              |
| 334     | Mixed-01 (Iscortex)                |
| 326     | Iscortex-09                        |
| 233     | Hippocampal region-04              |
| 378     | Hippocampal region-02              |
| 528     | Iscortex-01                        |
| 334     | Hippocampal region-03              |
| 252     | Fiber tracts-04                    |
| 140     | Ventricular systems-01             |
| 284     | Thalamus-01                        |
| 182     | Fiber tracts-05                    |
| 609     | Fiber tracts-01                    |
| 320     | Fiber tracts-03                    |
| 459     | Fiber tracts-02                    |
| 157     | Hippocampal region-08              |
| 167     | Hippocampal region-06              |
| 55      | Hippocampal region-11              |
| 203     | Hippocampal region-05              |



FIGURE S6

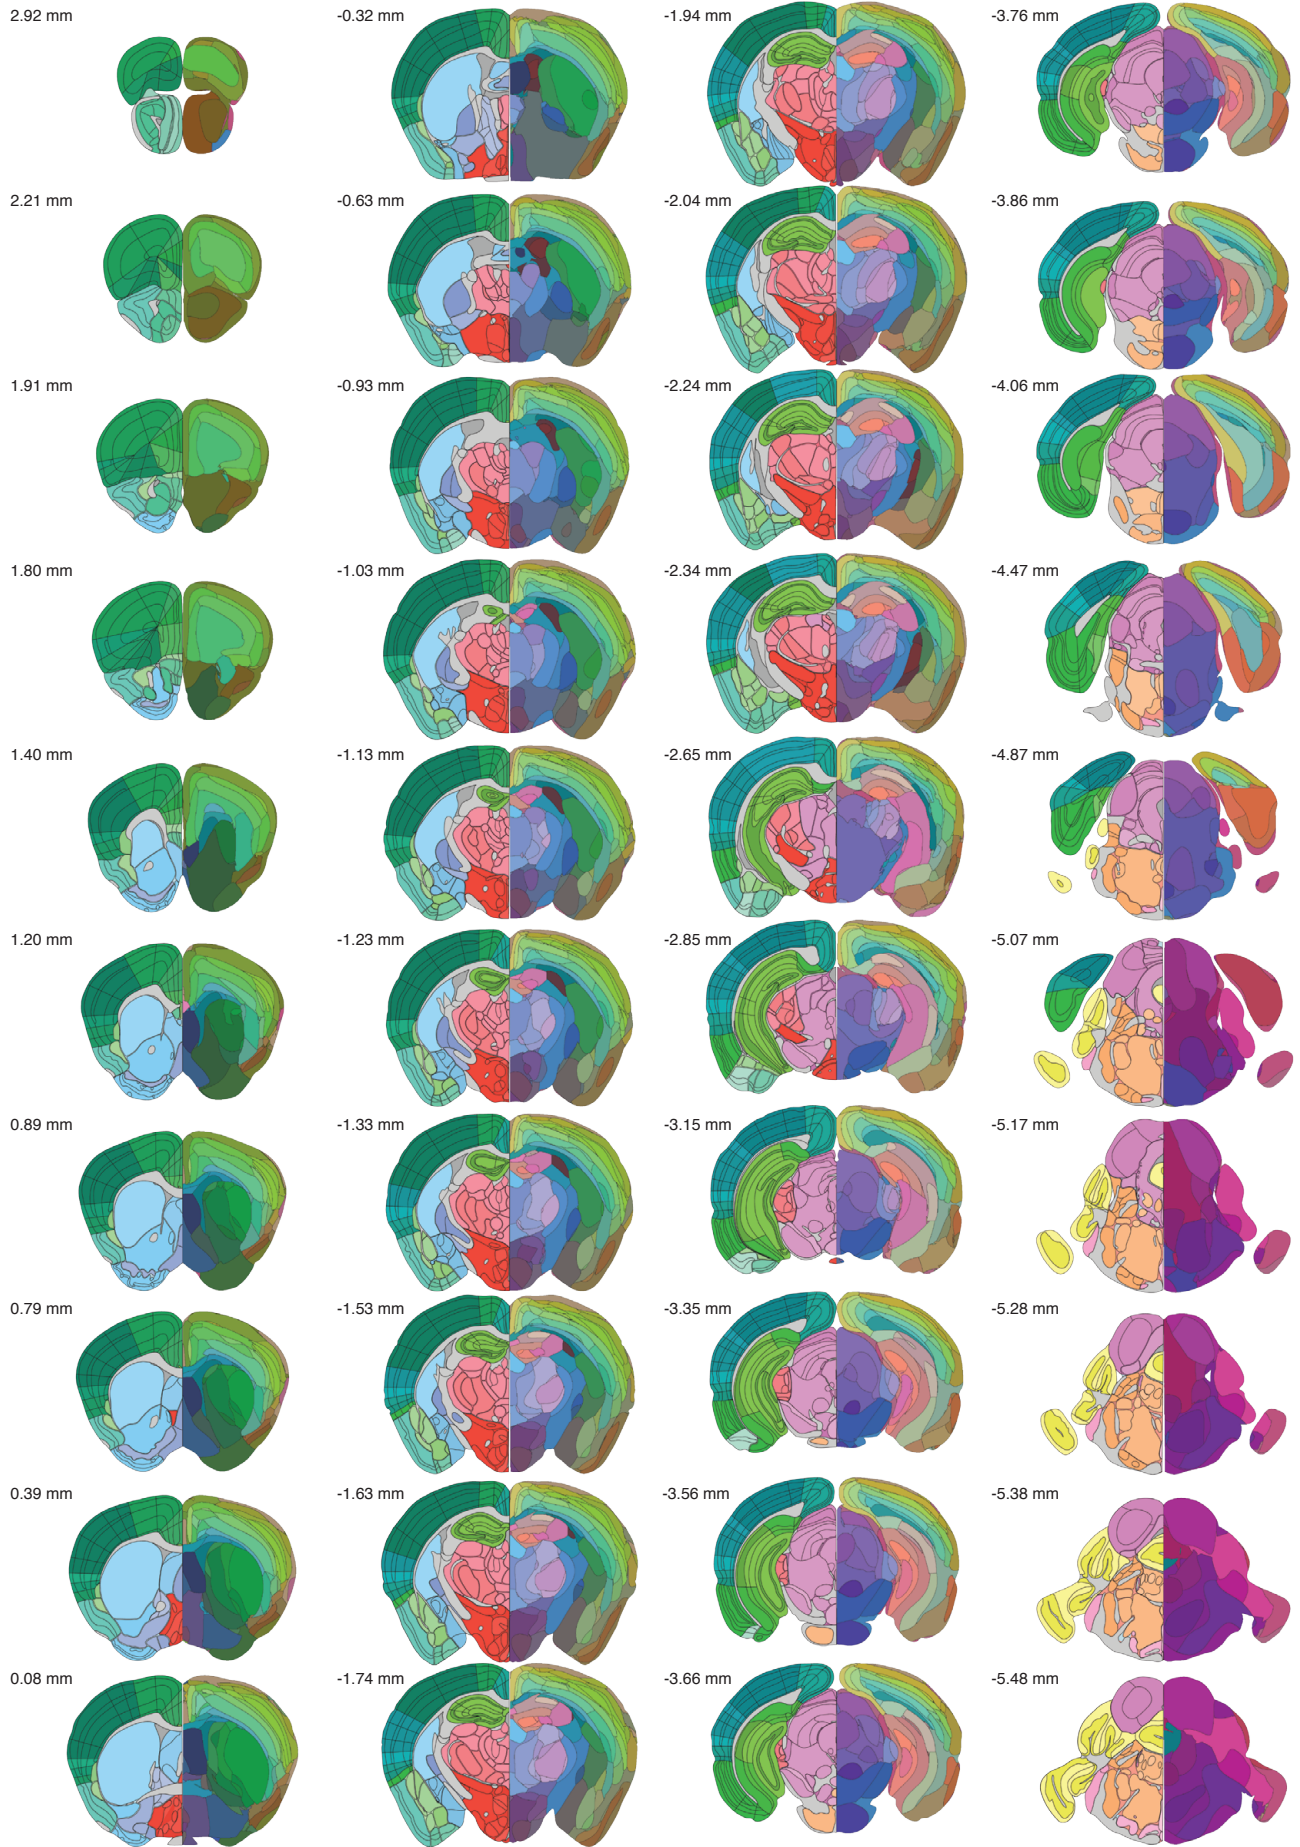

FIGURE S7

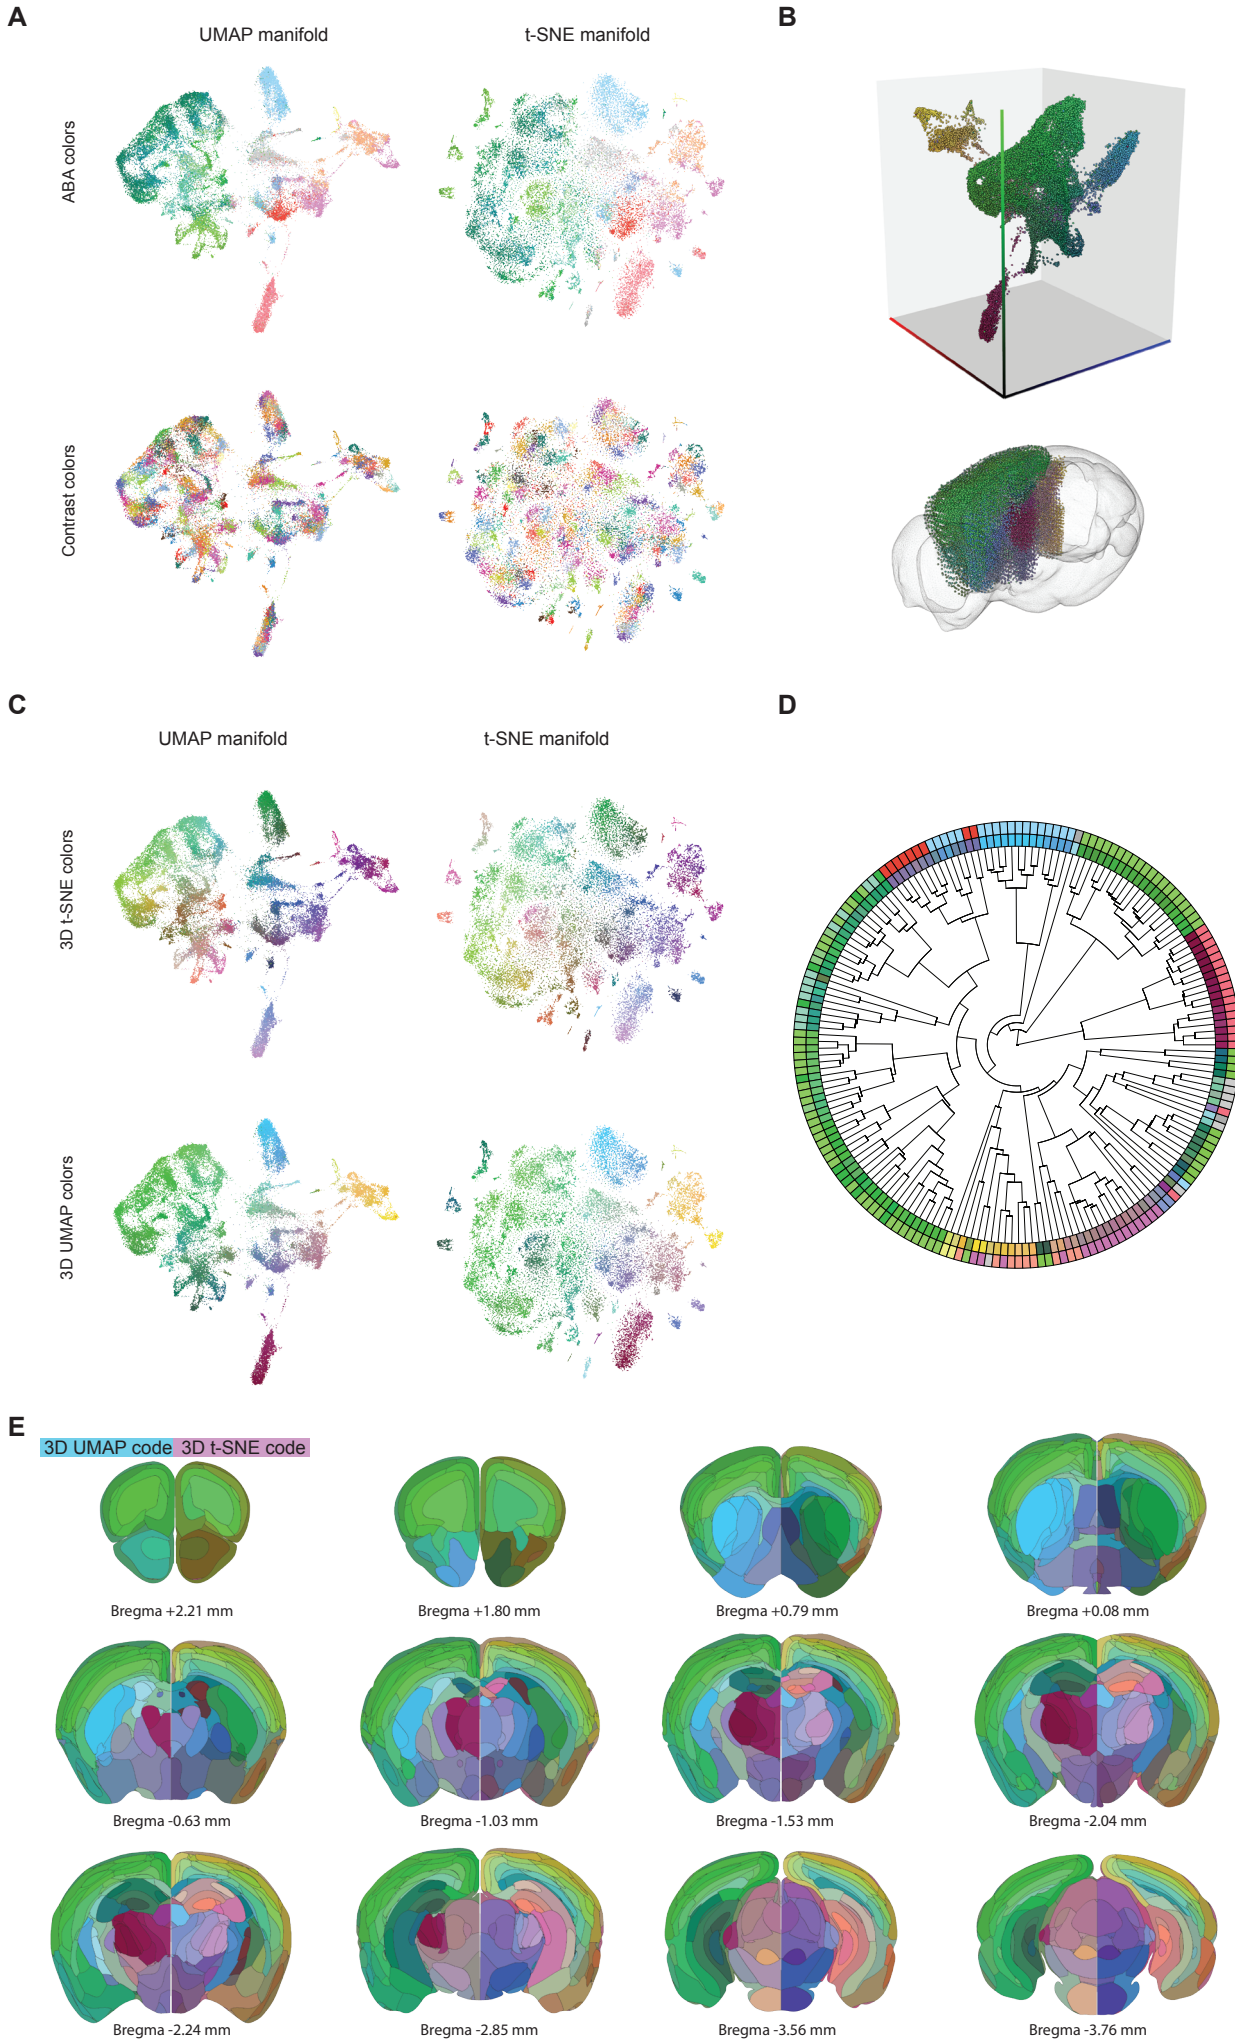



FIGURE S8

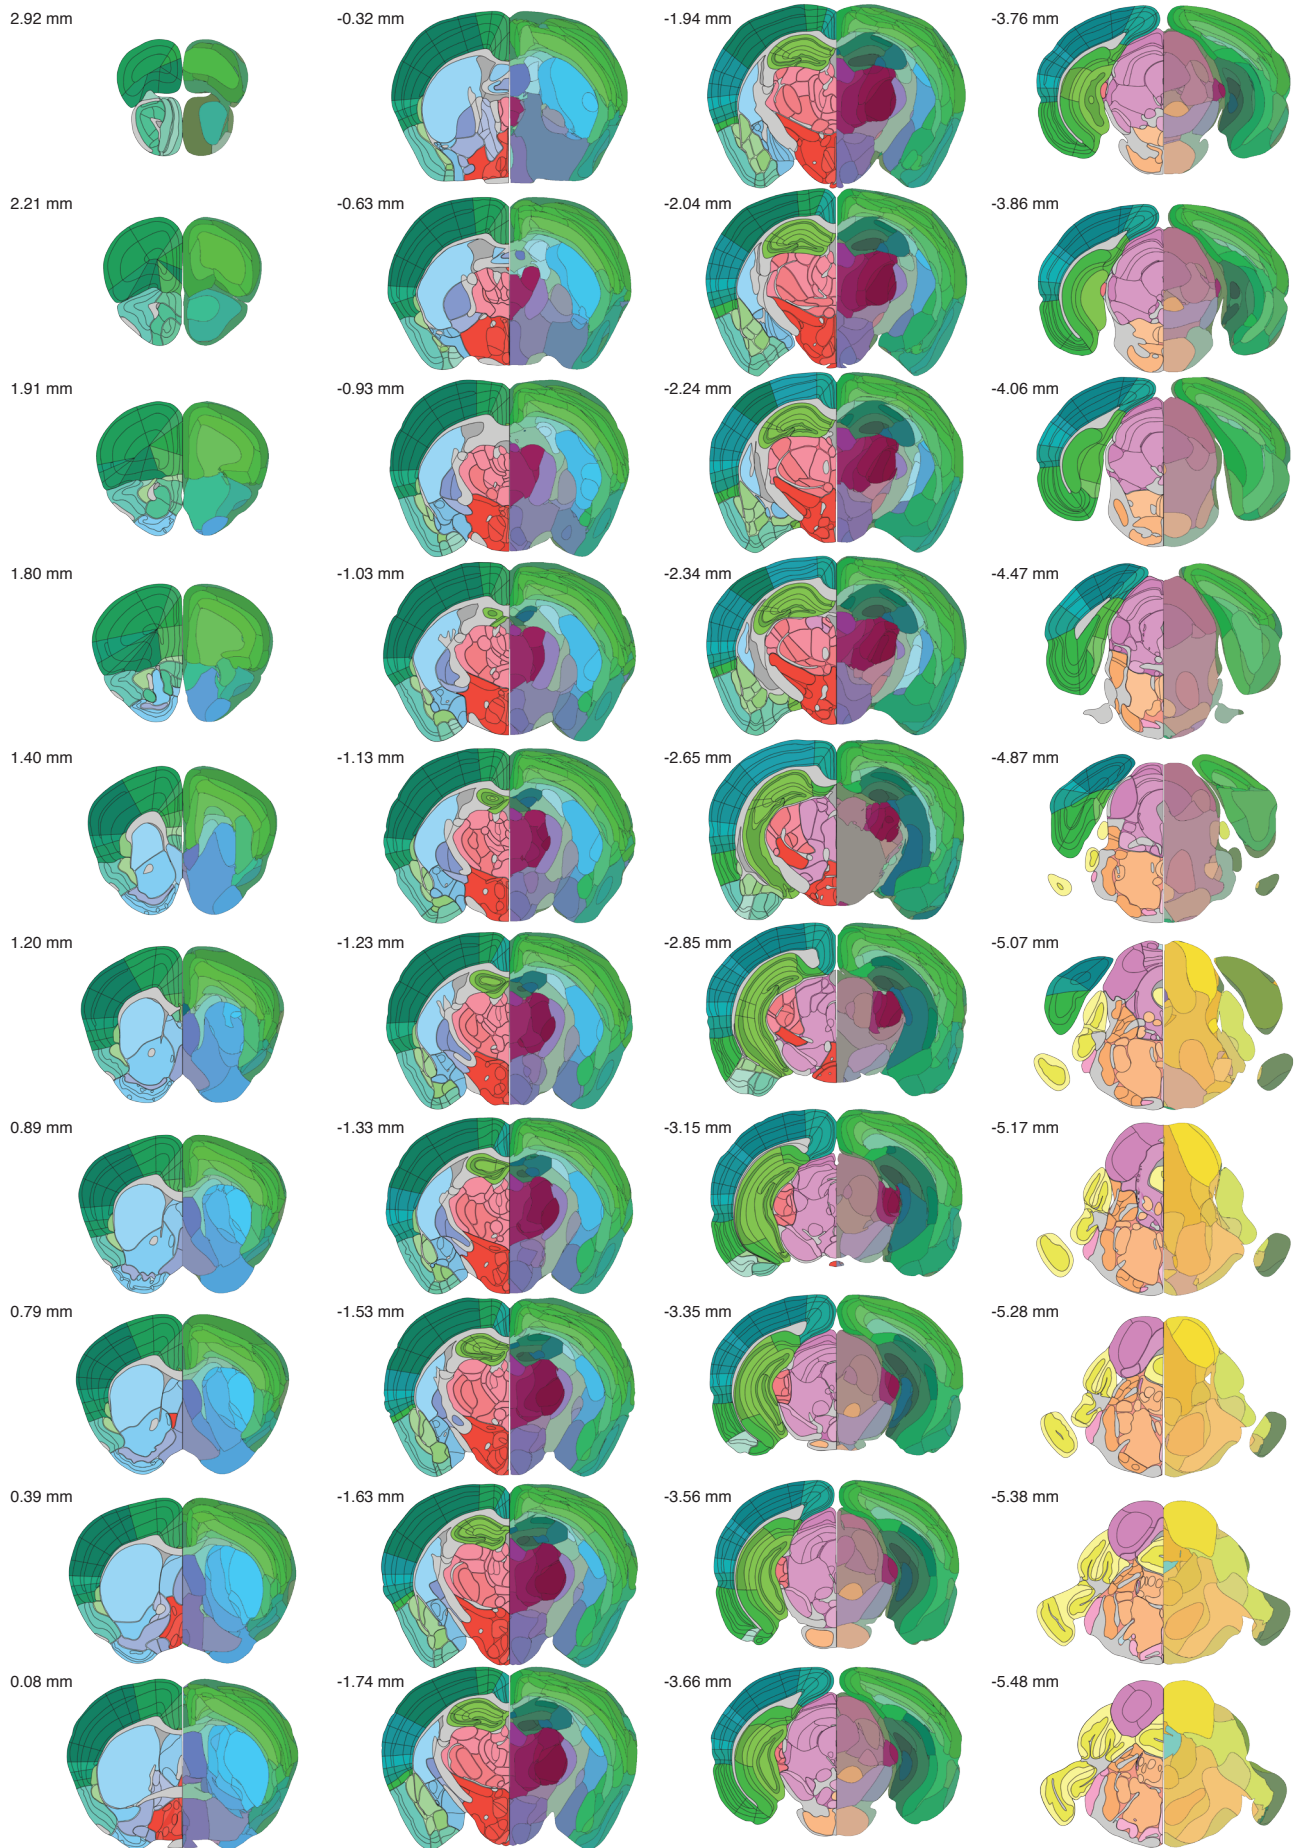



**FIGURE S9**

**A**

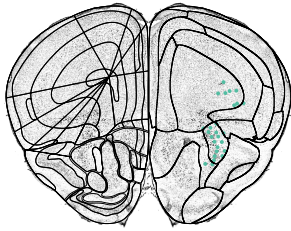

Npsr1

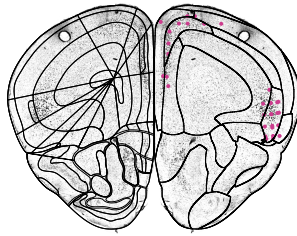

Sccpdh

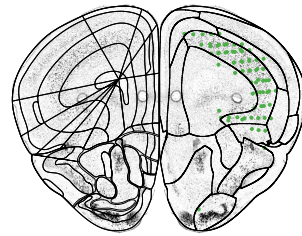

Scn4b

**B**

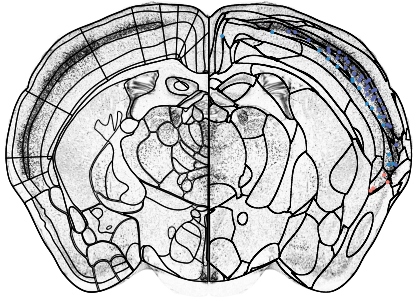

Rorb

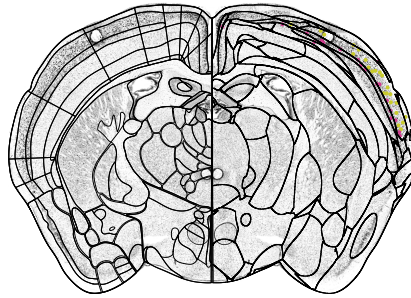

Ddit4l

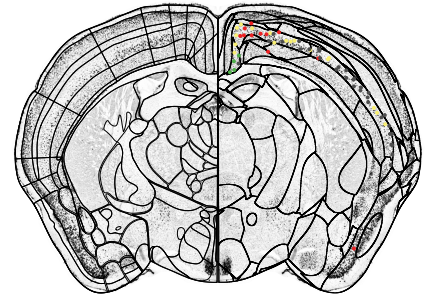

Nov

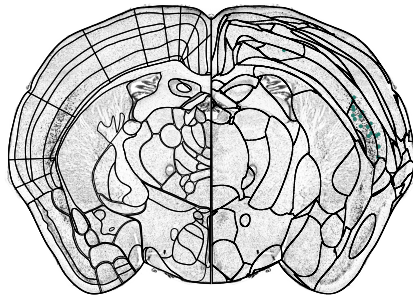

Gnb4

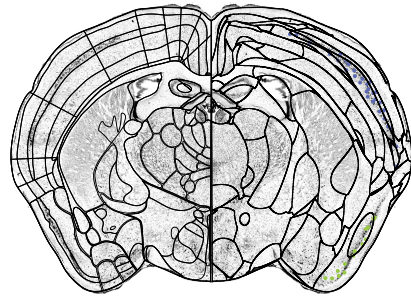

Cartpt

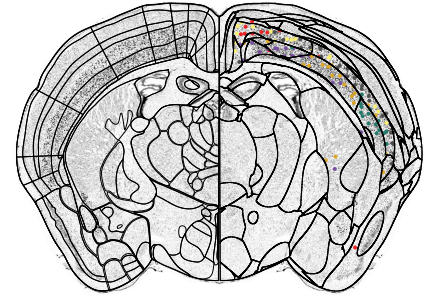

Myl4

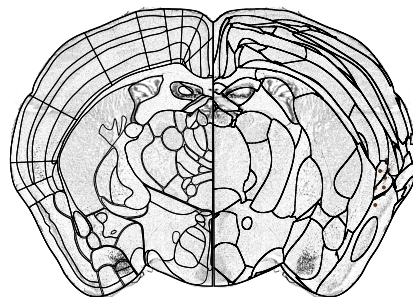

Cyp26b1

**C**

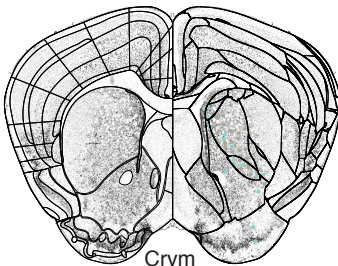

Crym

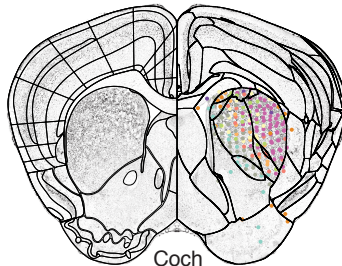

Coch

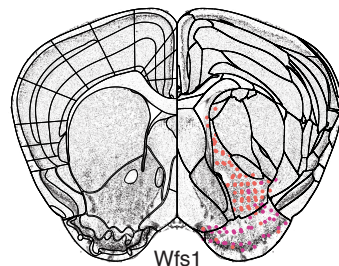

Wfs1

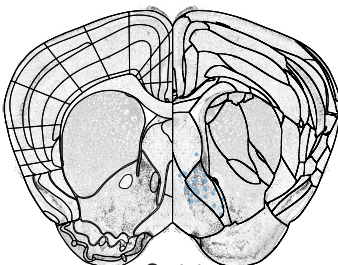

Cartpt

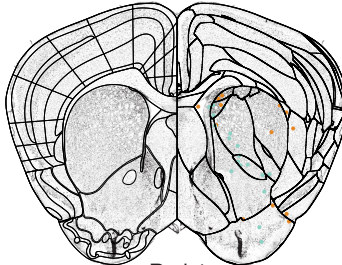

Rreb1

**FIGURE S10**

**A**

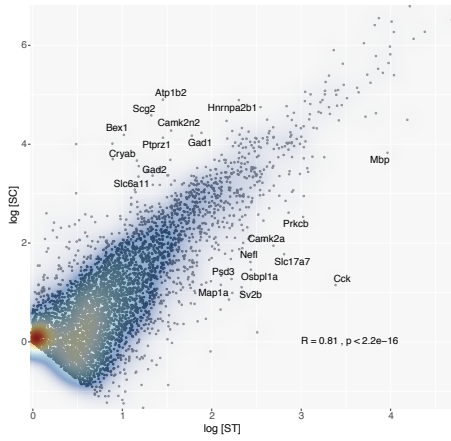

**B**

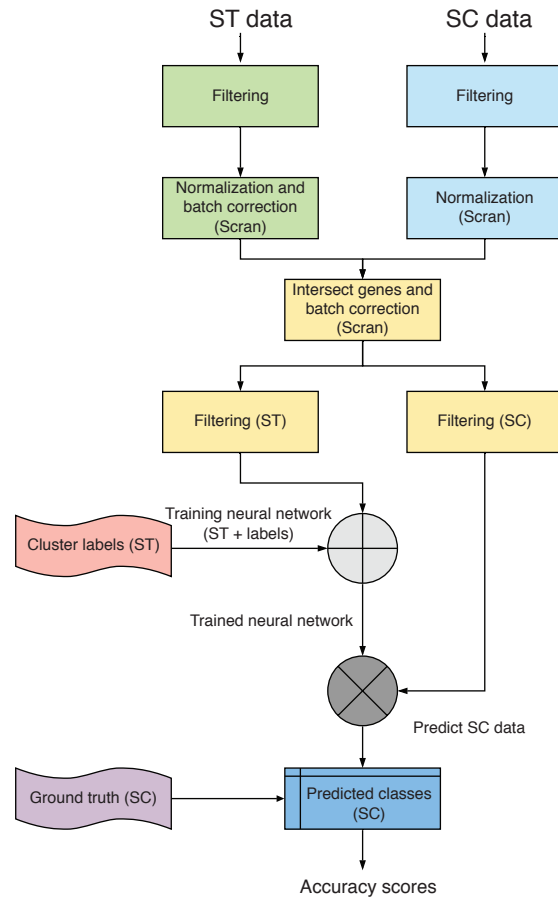

**C**

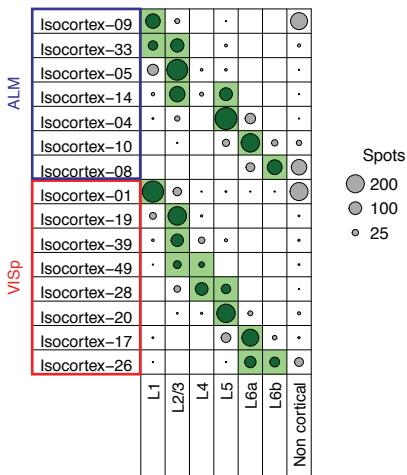

**D**

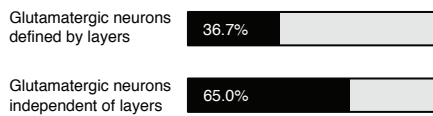

FIGURE S11

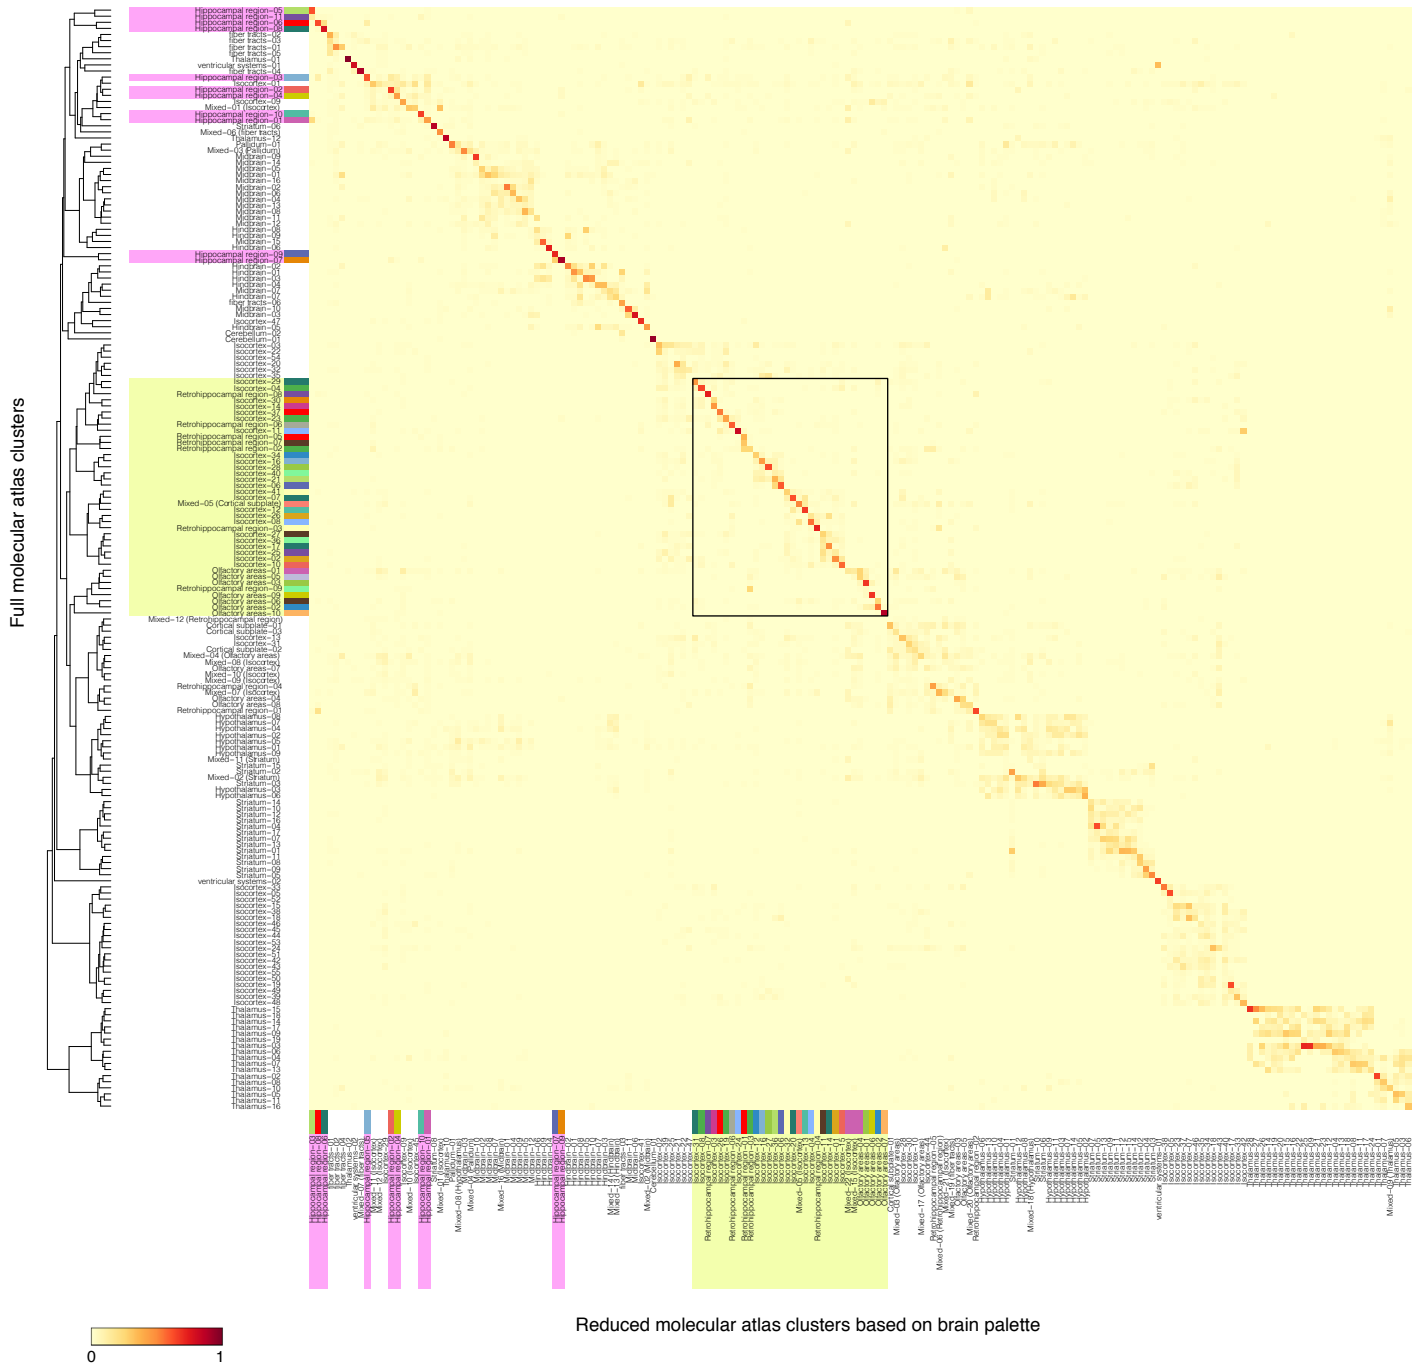





**FIGURE S13**

**A**

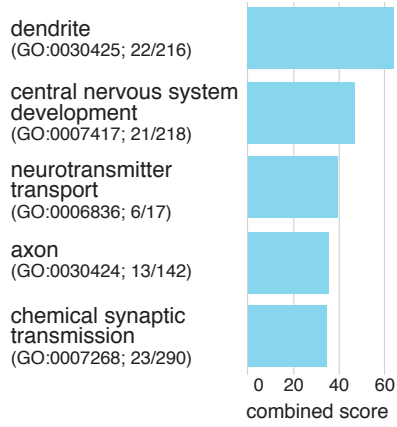

**B**

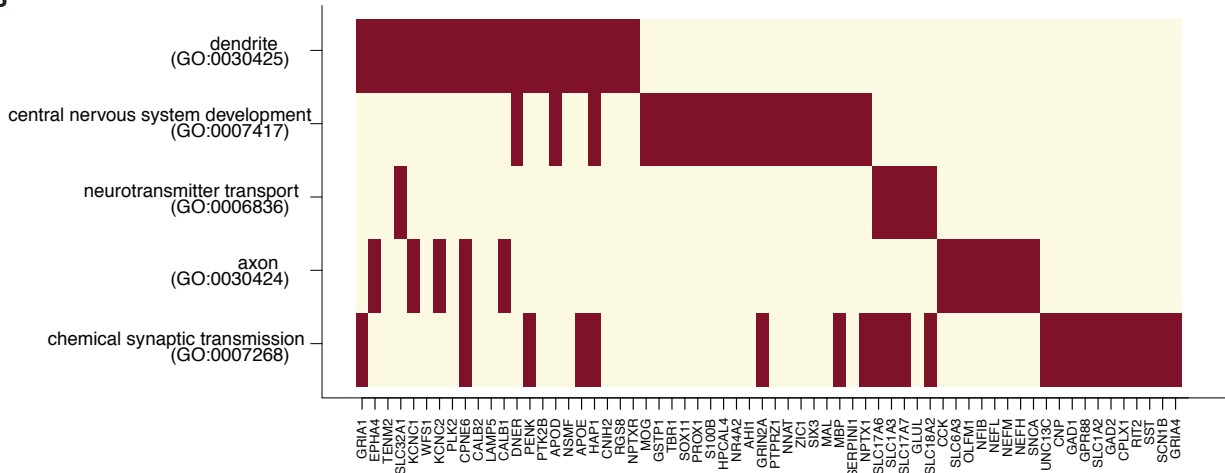

**C**

| Neuronal genes |         |          | Non neuronal genes |                |                |                |
|----------------|---------|----------|--------------------|----------------|----------------|----------------|
| Adarb1         | Adcy1   | Ahi1     | Acsbg1             | Adgrb2         | Agap2          | Agt            |
| Apod           | ApoE    | Arc      | Aldh1a1            | Aqp4           | Arpp21         | Basp1          |
| Atp1a1         | Atp2b1  | Cadm1    | Bhlhe22            | Cab39l         | Cabp7          | Camk4          |
| Calb1          | Calb2   | Camk2a   | Camkk2             | Car8           | Ccdc136        | Ccnd2          |
| Camk2n1        | Cck     | Cd24a    | Chgb               | Chn2           | Clic6          | Cnp            |
| Cldn11         | Cnih2   | Cnr1     | Cox5a              | Cpne4          | Crym           | Csrp1          |
| Cplx1          | Cplx3   | Cpne6    | Ctgf               | Dcn            | Diras2         | Dkk3           |
| Dbi            | Ddc     | Ddn      | Dusp1              | Efh2           | Egr1           | Egr4           |
| Dgkz           | Dner    | Enc1     | Enah               | Fam131a        | Fam163b        | Fam19a2        |
| Epha4          | Ernm    | Fos      | Fn1                | Folr1          | Fut9           | Gaa            |
| Gad1           | Gad2    | Glul     | Gda                | Gja1           | Gm15564        | Gnb4           |
| Gng13          | Gpr88   | Gpx1     | Gng2               | Gng4           | Gng7           | Gpr3711        |
| Gria1          | Gria4   | Grin2a   | Gprasp2            | Gstp1          | H3f3b          | Hba.a1         |
| Hap1           | Hpca    | Itpr1    | Hbb.bs             | Hexb           | Hlf            | Hopx           |
| Kalrn          | Kcnab1  | Kcnc1    | Hpcal4             | Hs3st4         | Id2            | Ier5           |
| Kcnc2          | Kcnj10  | Lamp5    | Igf2               | Igfbp2         | Igfbp5         | Ii33           |
| Macf1          | Mag     | Mbp      | Impact             | Junb           | Kl             | Lmo3           |
| Myoc           | Ndn     | Nefh     | Lmo4               | Lxn            | Ly6h           | Lypd1          |
| Nefl           | Nefm    | Nfib     | Mal                | Mef2c          | Meis2          | Mgp            |
| Nptx1          | Nrsn1   | Nsmf     | Mobp               | Mog            | Msx1           | Mt1            |
| Ntng1          | Olfm1   | Oxr1     | Mt2                | Myeov2         | Nap15          | Nat8l          |
| Pcp2           | Pcp4    | Pde10a   | Ndr1               | Necab1         | Necab2         | Neurod1        |
| Pde1b          | Penk    | Plcb4    | Neurod6            | Nnat           | Nov            | Nptxr          |
| Plekhb1        | Plk2    | Ppp1r1b  | Nr4a1              | Nr4a2          | Nrep           | Nrn1           |
| Ppp3ca         | Psd     | Ptk2b    | Nwd2               | Pcdh20         | Pcp411         | Pdp1           |
| Ptprz1         | Pvalb   | Resp18   | Pllp               | Plp1           | Pipp3          | Pou3f1         |
| Rgs8           | Rit2    | S100b    | Ppp1r1a            | Prdm8          | Prdx6          | Prox1          |
| Scg2           | Scn1b   | Serpini1 | Ptgds              | Ptma           | Ptms           | Ptpn3          |
| Sez6           | Sez6l2  | Slc17a6  | Ptpn4              | Ramp3          | Rasd2          | Rasgrf2        |
| Slc17a7        | Slc18a2 | Slc1a2   | Rasgrp1            | Rfx3           | Rgs4           | Rora           |
| Slc1a3         | Slc32a1 | Slc6a11  | Rorb               | Rpl9.ps6       | Rprm           | Satb1          |
| Slc6a3         | Snca    | Sst      | Sbk1               | Scn4b          | Sept14         | Shox2          |
| Stx1a          | Sv2b    | Syng1    | Six3               | Slc4a4         | Sostdc1        | Sox11          |
| Synpr          | Tac1    | Tenm2    | Sox2               | Sparc          | Spp1           | Stk32c         |
| Tubb4a         | Unc13c  | Vamp1    | Stum               | Tbctd9         | Tbr1           | Tcf7l2         |
| Wfs1           | Vim     | Vstm2l   | Tle4               | Tmem158        | Trf            | Trpm3          |
|                |         |          | Tspan2             | Ttc9b          | Ugt8a          | Usmg5          |
|                |         |          | Wipf3              | Vtn            | X1110008P14Rik | X1500015O10Rik |
|                |         |          | X2010300C02Rik     | X3110035E14Rik | Zbtb18         | Zbtb20         |
|                |         |          | Zchc12             | Zic1           |                |                |
